# Supplementary material for: FGFR redundancy limits the efficacy of FGFR4-selective inhibitors in hepatocellular carcinoma
Source: PubMed Central journal article supplement — Proc Natl Acad Sci U S A. 2022 Sep 30;119(40):e2208844119. doi: 10.1073/pnas.2208844119 (PMC9546626; doi:10.1073/pnas.2208844119), 2022-09-30
Supplement: pnas.2208844119.sapp.pdf [file pnas.2208844119.sapp.pdf]

1

2

3 **Supplementary Information for**  
4 **FGFR redundancy limits the efficacy of FGFR4-selective inhibitors in**  
5 **hepatocellular carcinoma**

6

7 Zhanchao Tao, Yue Cui, Xilong Xu, Ting Han

8

9

10 \* Yue Cui and Ting Han

11

12 Email: cuiyue@nibs.ac.cn and hanting@nibs.ac.cn.

13

14 **This PDF file includes:**

15

16           Figures S1 to S6

17           Tables S1 to S3

18

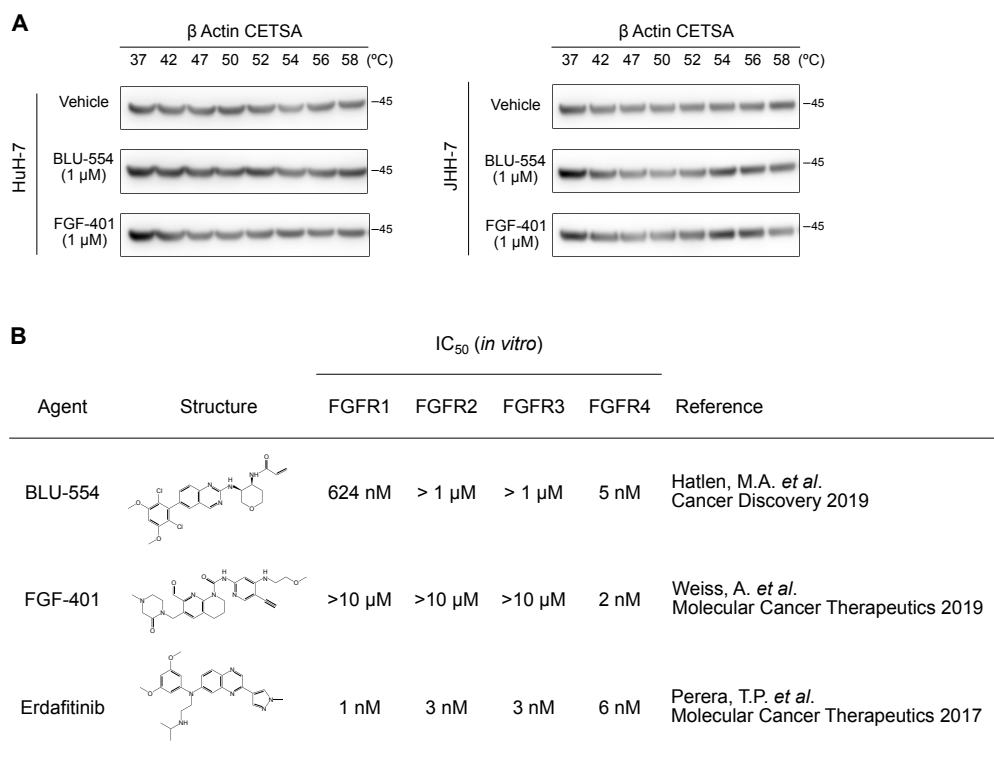

1

2 **Fig. S1: CETSA loading control ( $\beta$  Actin) (A) and *in vitro* potency and selectivity of BLU-554,**  
 3 **FGF-401, and erdafitinib reported previously (B).**

4

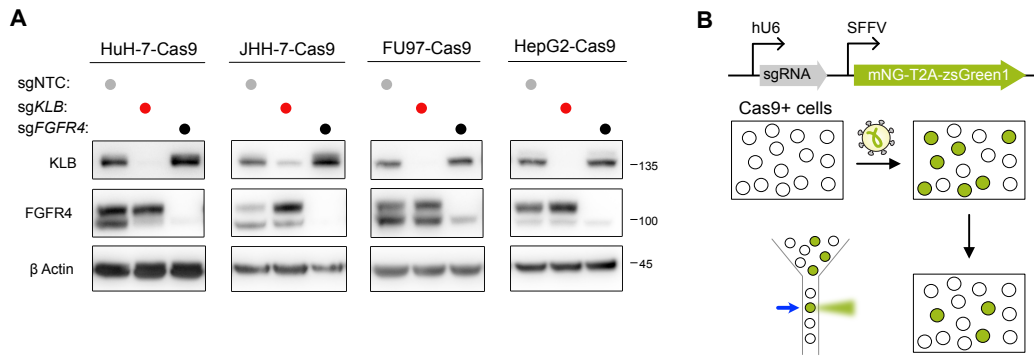

1

2 **Fig. S2: *In vitro* competitive cell growth assay to quantify the viability effects after CRISPR**

3 **inactivation of *KLB* and *FGFR4*.** (a) Verification of *KLB* and *FGFR4* CRISPR knockout

4 efficiencies in indicated cell lines by western blotting. (b) Diagram of the *in vitro* competitive cell

5 growth assay. Cas9-transduced cells were infected with lentivirus expressing an sgRNA and a

6 fluorescent protein marker at a low multiplicity of infection (0.2-0.4). Flow cytometry was used

7 to monitor the percentages of transduced GFP+ cells over time.

8

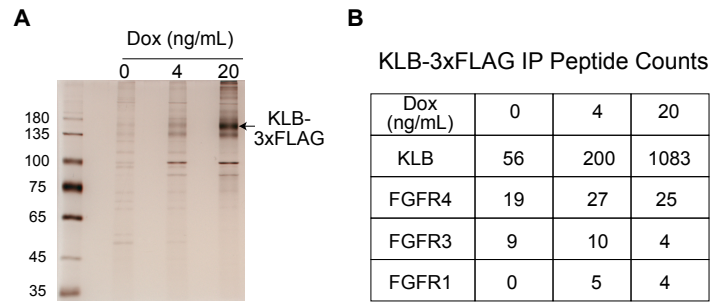

1

2 **Fig. S3: IP-MS of KLB-3xFLAG complex purified from HuH-7 cells. (a)** Visualization of the

3 KLB-3xFLAG complex immunopurified from HuH-7 cells by SDS-PAGE and silver staining.

4 KLB-3xFLAG was expressed by the tetracycline-inducible (Tet-On) system. **(b)** Total peptide

5 counts of indicated proteins identified in the KLB-3xFLAG complex by mass spectrometry.

6

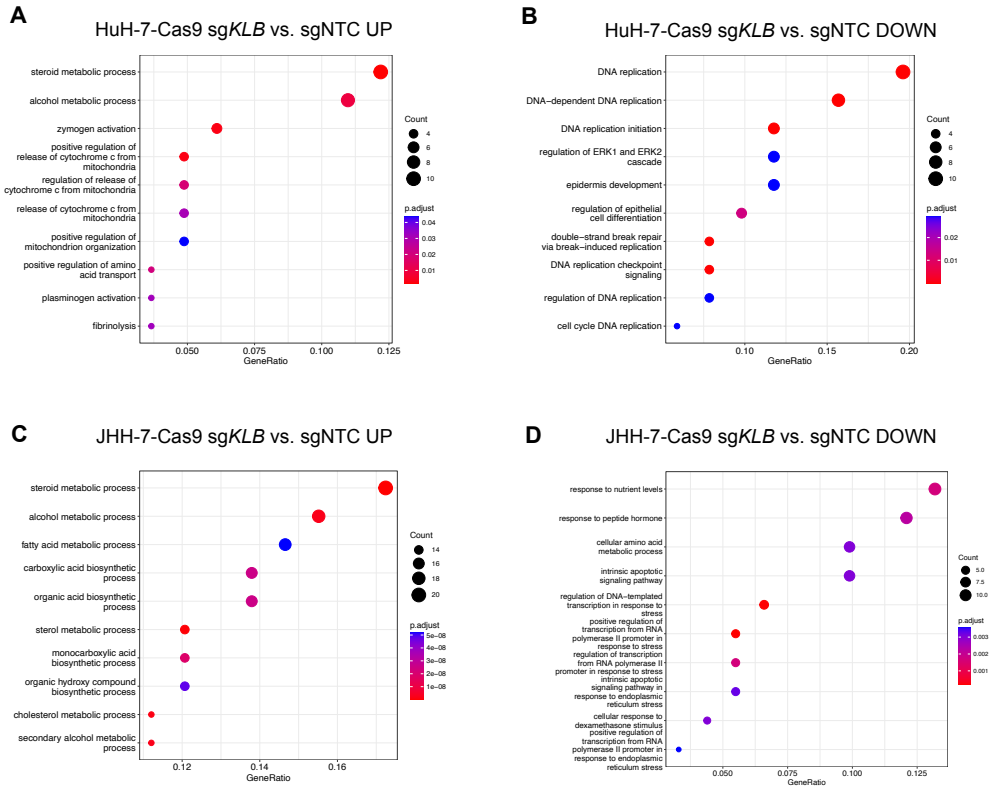

1  
2  
3  
4

**Fig. S4: Gene ontology enrichment analysis of differentially expressed genes in HuH-7-Cas9 and JHH-7-Cas9 cells after CRISPR inactivation of *KLB*.**

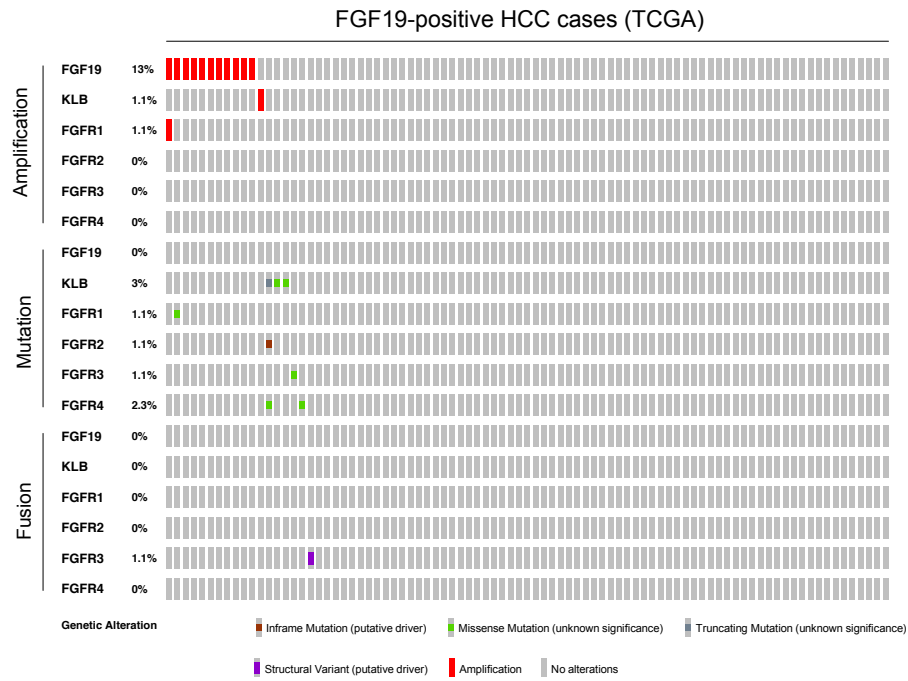

1  
2  
3  
4

**Fig. S5: Analysis of genetic alterations of *FGF19*, *KLB*, *FGFR1/2/3/4* in *FGF19*-positive HCC cases in TCGA.**

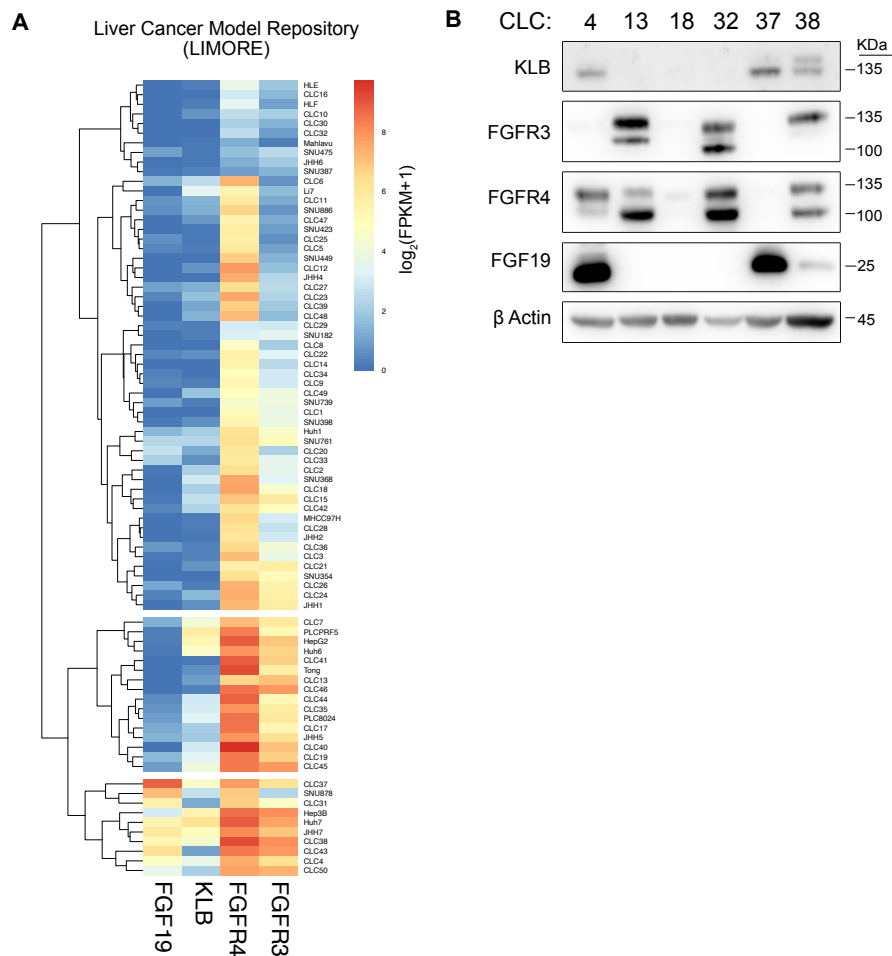

1  
 2 **Fig. S6: Expression of FGF19, KLB, FGFR3, and FGFR4 of cell lines from the LIMORE**  
 3 **collection. (a) Heatmap depicting mRNA levels of *FGF19*, *KLB*, *FGFR3*, and *FGFR4* in LIMORE**  
 4 **cell lines. (b) Western blots showing proteins levels of FGF19, KLB, FGFR3, and FGFR4 in 6 cell**  
 5 **lines from LIMORE.**  
 6

1 **Supplementary Tables**

2 **Table S1:** Tukey's multiple comparison test (*P* values) for Fig. 5B.

| Tukey's multiple comparisons test | Mean Diff. | 95.00% CI of diff. | Significant? | Summary | Adjusted P Value |
|-----------------------------------|------------|--------------------|--------------|---------|------------------|
| sgNTC vs. sgKLB                   | 7.687      | 6.631 to 8.742     | Yes          | ****    | <0.000001        |
| sgNTC vs. sgFGFR1                 | -0.4016    | -1.457 to 0.654    | No           | ns      | 0.943019         |
| sgNTC vs. sgFGFR3                 | 3.268      | 2.213 to 4.324     | Yes          | ****    | <0.000001        |
| sgNTC vs. sgFGFR4                 | 5.835      | 4.779 to 6.89      | Yes          | ****    | <0.000001        |
| sgNTC vs. sgFGFR1/3               | 3.723      | 2.668 to 4.779     | Yes          | ****    | <0.000001        |
| sgNTC vs. sgFGFR1/4               | 5.208      | 4.152 to 6.263     | Yes          | ****    | <0.000001        |
| sgNTC vs. sgFGFR3/4               | 9.246      | 8.19 to 10.3       | Yes          | ****    | <0.000001        |
| sgNTC vs. sgFGFR1/3/4             | 9.394      | 8.339 to 10.45     | Yes          | ****    | <0.000001        |
| sgKLB vs. sgFGFR1                 | -8.088     | -9.144 to -7.033   | Yes          | ****    | <0.000001        |
| sgKLB vs. sgFGFR3                 | -4.419     | -5.474 to -3.363   | Yes          | ****    | <0.000001        |
| sgKLB vs. sgFGFR4                 | -1.852     | -2.908 to -0.7965  | Yes          | ****    | 0.000028         |
| sgKLB vs. sgFGFR1/3               | -3.964     | -5.019 to -2.908   | Yes          | ****    | <0.000001        |
| sgKLB vs. sgFGFR1/4               | -2.479     | -3.535 to -1.423   | Yes          | ****    | <0.000001        |
| sgKLB vs. sgFGFR3/4               | 1.559      | 0.5032 to 2.614    | Yes          | ***     | 0.000543         |
| sgKLB vs. sgFGFR1/3/4             | 1.707      | 0.6518 to 2.763    | Yes          | ***     | 0.000122         |
| sgFGFR1 vs. sgFGFR3               | 3.67       | 2.614 to 4.725     | Yes          | ****    | <0.000001        |
| sgFGFR1 vs. sgFGFR4               | 6.236      | 5.181 to 7.292     | Yes          | ****    | <0.000001        |
| sgFGFR1 vs. sgFGFR1/3             | 4.125      | 3.069 to 5.18      | Yes          | ****    | <0.000001        |
| sgFGFR1 vs. sgFGFR1/4             | 5.609      | 4.554 to 6.665     | Yes          | ****    | <0.000001        |
| sgFGFR1 vs. sgFGFR3/4             | 9.647      | 8.592 to 10.7      | Yes          | ****    | <0.000001        |
| sgFGFR1 vs. sgFGFR1/3/4           | 9.796      | 8.74 to 10.85      | Yes          | ****    | <0.000001        |
| sgFGFR3 vs. sgFGFR4               | 2.567      | 1.511 to 3.622     | Yes          | ****    | <0.000001        |
| sgFGFR3 vs. sgFGFR1/3             | 0.455      | -0.6005 to 1.511   | No           | ns      | 0.890379         |
| sgFGFR3 vs. sgFGFR1/4             | 1.94       | 0.8842 to 2.995    | Yes          | ****    | 0.000011         |
| sgFGFR3 vs. sgFGFR3/4             | 5.977      | 4.922 to 7.033     | Yes          | ****    | <0.000001        |
| sgFGFR3 vs. sgFGFR1/3/4           | 6.126      | 5.071 to 7.182     | Yes          | ****    | <0.000001        |
| sgFGFR4 vs. sgFGFR1/3             | -2.112     | -3.167 to -1.056   | Yes          | ****    | 0.000002         |
| sgFGFR4 vs. sgFGFR1/4             | -0.627     | -1.682 to 0.4286   | No           | ns      | 0.594428         |
| sgFGFR4 vs. sgFGFR3/4             | 3.411      | 2.355 to 4.466     | Yes          | ****    | <0.000001        |
| sgFGFR4 vs. sgFGFR1/3/4           | 3.559      | 2.504 to 4.615     | Yes          | ****    | <0.000001        |
| sgFGFR1/3 vs. sgFGFR1/4           | 1.485      | 0.4292 to 2.54     | Yes          | **      | 0.001122         |
| sgFGFR1/3 vs. sgFGFR3/4           | 5.522      | 4.467 to 6.578     | Yes          | ****    | <0.000001        |
| sgFGFR1/3 vs. sgFGFR1/3/4         | 5.671      | 4.616 to 6.727     | Yes          | ****    | <0.000001        |
| sgFGFR1/4 vs. sgFGFR3/4           | 4.038      | 2.982 to 5.093     | Yes          | ****    | <0.000001        |
| sgFGFR1/4 vs. sgFGFR1/3/4         | 4.186      | 3.131 to 5.242     | Yes          | ****    | <0.000001        |
| sgFGFR3/4 vs. sgFGFR1/3/4         | 0.1487     | -0.9069 to 1.204   | No           | ns      | 0.999936         |

3

4



1 **Table S2:** Tukey's multiple comparison test (*P* values) for Fig. 5C.

| Tukey's multiple comparisons test | Mean Diff. | 95.00% CI of diff.  | Significant? | Summary | Adjusted P Value |
|-----------------------------------|------------|---------------------|--------------|---------|------------------|
| sgNTC vs. sgKLB                   | 3.25       | 2.873 to 3.627      | Yes          | ****    | <0.000001        |
| sgNTC vs. sgFGFR1                 | 0.8636     | 0.4863 to 1.241     | Yes          | ****    | <0.000001        |
| sgNTC vs. sgFGFR3                 | 0.3964     | 0.01911 to 0.7738   | Yes          | *       | 0.032278         |
| sgNTC vs. sgFGFR4                 | 0.6048     | 0.2275 to 0.9822    | Yes          | ****    | 0.000093         |
| sgNTC vs. sgFGFR1/3               | 1.267      | 0.8898 to 1.645     | Yes          | ****    | <0.000001        |
| sgNTC vs. sgFGFR1/4               | 1.104      | 0.7265 to 1.481     | Yes          | ****    | <0.000001        |
| sgNTC vs. sgFGFR3/4               | 2.544      | 2.167 to 2.921      | Yes          | ****    | <0.000001        |
| sgNTC vs. sgFGFR1/3/4             | 3.035      | 2.658 to 3.413      | Yes          | ****    | <0.000001        |
| sgKLB vs. sgFGFR1                 | -2.386     | -2.764 to -2.009    | Yes          | ****    | <0.000001        |
| sgKLB vs. sgFGFR3                 | -2.853     | -3.231 to -2.476    | Yes          | ****    | <0.000001        |
| sgKLB vs. sgFGFR4                 | -2.645     | -3.022 to -2.268    | Yes          | ****    | <0.000001        |
| sgKLB vs. sgFGFR1/3               | -1.983     | -2.36 to -1.605     | Yes          | ****    | <0.000001        |
| sgKLB vs. sgFGFR1/4               | -2.146     | -2.523 to -1.769    | Yes          | ****    | <0.000001        |
| sgKLB vs. sgFGFR3/4               | -0.7057    | -1.083 to -0.3284   | Yes          | ****    | 0.000004         |
| sgKLB vs. sgFGFR1/3/4             | -0.2144    | -0.5918 to 0.1629   | No           | ns      | 0.665491         |
| sgFGFR1 vs. sgFGFR3               | -0.4672    | -0.8445 to -0.08986 | Yes          | **      | 0.005373         |
| sgFGFR1 vs. sgFGFR4               | -0.2588    | -0.6361 to 0.1185   | No           | ns      | 0.416431         |
| sgFGFR1 vs. sgFGFR1/3             | 0.4035     | 0.02621 to 0.7809   | Yes          | *       | 0.027284         |
| sgFGFR1 vs. sgFGFR1/4             | 0.2402     | -0.1371 to 0.6175   | No           | ns      | 0.519345         |
| sgFGFR1 vs. sgFGFR3/4             | 1.681      | 1.303 to 2.058      | Yes          | ****    | <0.000001        |
| sgFGFR1 vs. sgFGFR1/3/4           | 2.172      | 1.794 to 2.549      | Yes          | ****    | <0.000001        |
| sgFGFR3 vs. sgFGFR4               | 0.2084     | -0.169 to 0.5857    | No           | ns      | 0.698656         |
| sgFGFR3 vs. sgFGFR1/3             | 0.8707     | 0.4934 to 1.248     | Yes          | ****    | <0.000001        |
| sgFGFR3 vs. sgFGFR1/4             | 0.7074     | 0.33 to 1.085       | Yes          | ****    | 0.000003         |
| sgFGFR3 vs. sgFGFR3/4             | 2.148      | 1.77 to 2.525       | Yes          | ****    | <0.000001        |
| sgFGFR3 vs. sgFGFR1/3/4           | 2.639      | 2.262 to 3.016      | Yes          | ****    | <0.000001        |
| sgFGFR4 vs. sgFGFR1/3             | 0.6624     | 0.285 to 1.04       | Yes          | ****    | 0.000015         |
| sgFGFR4 vs. sgFGFR1/4             | 0.499      | 0.1217 to 0.8763    | Yes          | **      | 0.002228         |
| sgFGFR4 vs. sgFGFR3/4             | 1.939      | 1.562 to 2.317      | Yes          | ****    | <0.000001        |
| sgFGFR4 vs. sgFGFR1/3/4           | 2.431      | 2.053 to 2.808      | Yes          | ****    | <0.000001        |
| sgFGFR1/3 vs. sgFGFR1/4           | -0.1634    | -0.5407 to 0.214    | No           | ns      | 0.897244         |
| sgFGFR1/3 vs. sgFGFR3/4           | 1.277      | 0.8996 to 1.654     | Yes          | ****    | <0.000001        |
| sgFGFR1/3 vs. sgFGFR1/3/4         | 1.768      | 1.391 to 2.146      | Yes          | ****    | <0.000001        |
| sgFGFR1/4 vs. sgFGFR3/4           | 1.44       | 1.063 to 1.818      | Yes          | ****    | <0.000001        |
| sgFGFR1/4 vs. sgFGFR1/3/4         | 1.932      | 1.554 to 2.309      | Yes          | ****    | <0.000001        |
| sgFGFR3/4 vs. sgFGFR1/3/4         | 0.4913     | 0.1139 to 0.8686    | Yes          | **      | 0.00277          |

2

3

1 **Table S3:** Tukey's multiple comparison test (*P* values) for Fig. 6E.

| Tukey's multiple comparisons test | Mean Diff. | 95.00% CI of diff.  | Significant? | Summary | Adjusted P Value |
|-----------------------------------|------------|---------------------|--------------|---------|------------------|
| sgNTC vs. sgKLB                   | 4.018      | 3.702 to 4.334      | Yes          | ****    | <0.000001        |
| sgNTC vs. sgFGFR1                 | 0.184      | -0.1323 to 0.5003   | No           | ns      | 0.606452         |
| sgNTC vs. sgFGFR3                 | 0.474      | 0.1577 to 0.7903    | Yes          | ***     | 0.000552         |
| sgNTC vs. sgFGFR4                 | 2.678      | 2.362 to 2.994      | Yes          | ****    | <0.000001        |
| sgNTC vs. sgFGFR1/3               | 0.786      | 0.4697 to 1.102     | Yes          | ****    | <0.000001        |
| sgNTC vs. sgFGFR1/4               | 2.406      | 2.09 to 2.722       | Yes          | ****    | <0.000001        |
| sgNTC vs. sgFGFR3/4               | 3.854      | 3.538 to 4.17       | Yes          | ****    | <0.000001        |
| sgNTC vs. sgFGFR1/3/4             | 3.564      | 3.248 to 3.88       | Yes          | ****    | <0.000001        |
| sgKLB vs. sgFGFR1                 | -3.834     | -4.15 to -3.518     | Yes          | ****    | <0.000001        |
| sgKLB vs. sgFGFR3                 | -3.544     | -3.86 to -3.228     | Yes          | ****    | <0.000001        |
| sgKLB vs. sgFGFR4                 | -1.34      | -1.656 to -1.024    | Yes          | ****    | <0.000001        |
| sgKLB vs. sgFGFR1/3               | -3.232     | -3.548 to -2.916    | Yes          | ****    | <0.000001        |
| sgKLB vs. sgFGFR1/4               | -1.612     | -1.928 to -1.296    | Yes          | ****    | <0.000001        |
| sgKLB vs. sgFGFR3/4               | -0.164     | -0.4803 to 0.1523   | No           | ns      | 0.736951         |
| sgKLB vs. sgFGFR1/3/4             | -0.454     | -0.7703 to -0.1377  | Yes          | **      | 0.00102          |
| sgFGFR1 vs. sgFGFR3               | 0.29       | -0.02631 to 0.6063  | No           | ns      | 0.093983         |
| sgFGFR1 vs. sgFGFR4               | 2.494      | 2.178 to 2.81       | Yes          | ****    | <0.000001        |
| sgFGFR1 vs. sgFGFR1/3             | 0.602      | 0.2857 to 0.9183    | Yes          | ****    | 0.00001          |
| sgFGFR1 vs. sgFGFR1/4             | 2.222      | 1.906 to 2.538      | Yes          | ****    | <0.000001        |
| sgFGFR1 vs. sgFGFR3/4             | 3.67       | 3.354 to 3.986      | Yes          | ****    | <0.000001        |
| sgFGFR1 vs. sgFGFR1/3/4           | 3.38       | 3.064 to 3.696      | Yes          | ****    | <0.000001        |
| sgFGFR3 vs. sgFGFR4               | 2.204      | 1.888 to 2.52       | Yes          | ****    | <0.000001        |
| sgFGFR3 vs. sgFGFR1/3             | 0.312      | -0.004307 to 0.6283 | No           | ns      | 0.055633         |
| sgFGFR3 vs. sgFGFR1/4             | 1.932      | 1.616 to 2.248      | Yes          | ****    | <0.000001        |
| sgFGFR3 vs. sgFGFR3/4             | 3.38       | 3.064 to 3.696      | Yes          | ****    | <0.000001        |
| sgFGFR3 vs. sgFGFR1/3/4           | 3.09       | 2.774 to 3.406      | Yes          | ****    | <0.000001        |
| sgFGFR4 vs. sgFGFR1/3             | -1.892     | -2.208 to -1.576    | Yes          | ****    | <0.000001        |
| sgFGFR4 vs. sgFGFR1/4             | -0.272     | -0.5883 to 0.04431  | No           | ns      | 0.140215         |
| sgFGFR4 vs. sgFGFR3/4             | 1.176      | 0.8597 to 1.492     | Yes          | ****    | <0.000001        |
| sgFGFR4 vs. sgFGFR1/3/4           | 0.886      | 0.5697 to 1.202     | Yes          | ****    | <0.000001        |
| sgFGFR1/3 vs. sgFGFR1/4           | 1.62       | 1.304 to 1.936      | Yes          | ****    | <0.000001        |
| sgFGFR1/3 vs. sgFGFR3/4           | 3.068      | 2.752 to 3.384      | Yes          | ****    | <0.000001        |
| sgFGFR1/3 vs. sgFGFR1/3/4         | 2.778      | 2.462 to 3.094      | Yes          | ****    | <0.000001        |
| sgFGFR1/4 vs. sgFGFR3/4           | 1.448      | 1.132 to 1.764      | Yes          | ****    | <0.000001        |
| sgFGFR1/4 vs. sgFGFR1/3/4         | 1.158      | 0.8417 to 1.474     | Yes          | ****    | <0.000001        |
| sgFGFR3/4 vs. sgFGFR1/3/4         | -0.29      | -0.6063 to 0.02631  | No           | ns      | 0.093983         |

2
